# Supplementary material for: Low plasma stem cell factor combined with high transforming growth factor-α identifies high-risk patients in pulmonary arterial hypertension
Source: PubMed Central journal article supplement — ERJ Open Res. 2018 Nov 12;4(4):00035-2018. doi: 10.1183/23120541.00035-2018 (PMC6230818; doi:10.1183/23120541.00035-2018), 2018-11-12
Supplement: 00035-2018_tableS1.pdf [file 00035-2018_tableS1.pdf]

**Table S1**

|                                                  |                             |                                                 |
|--------------------------------------------------|-----------------------------|-------------------------------------------------|
| <b>APAH-CTD</b><br>n = 25                        | <b>APAH-PoPH</b><br>n = 0   | <b>FPAH</b><br>n = 2                            |
| <b>Renal insufficiency*</b><br>n = 7             |                             | <b>Males &gt; 60 years</b><br>n = 6             |
| <b>WHO FC I</b><br>n = 1                         | <b>WHO FC III</b><br>n = 28 | <b>WHO FC IV</b><br>n = 2                       |
| <b>SBP &lt; 110 mmHg</b><br>n = 7                |                             | <b>Heart rate &gt; 92 BPM</b><br>n = 12         |
| <b>6MWD ≥ 440 m</b><br>n=4                       |                             | <b>6MWD &lt; 165 m</b><br>n = 9                 |
| <b>NT-proBNP &lt; 300 pg/ml</b><br>n = 4         |                             | <b>NT-proBNP &gt; 1500 pg/ml</b><br>n = 29      |
| <b>Pericardial effusion</b><br>n = 2             |                             |                                                 |
| <b>% predicted DL<sub>co</sub> ≥80%</b><br>n = 5 |                             | <b>% predicted DL<sub>co</sub> ≤32</b><br>n = 3 |
| <b>mRAP &gt; 20 mmHg</b><br>n = 1                |                             | <b>PVR &gt; 32 WU</b><br>n = 0                  |

The number patients meeting the criteria for each element constituting the REVEAL risk score. \*renal insufficiency was defined as creatinine > 120 mmol/L. There were 2 missing creatinine values, 8 missing WHO-FC values, 2 missing 6MWD values, 2 missing NT-proBNP values, 18 missing DL<sub>co</sub> values and 7 patients missing information regarding pericardial effusion. 6MWD, 6-minute walk distance; APAH, associated pulmonary arterial hypertension; CTD, connective tissue disease; FPAH, familial pulmonary arterial hypertension; MRAP, mean right atrial pressure; PoPH, portopulmonary hypertension; PVR, pulmonary vascular resistance; SBP, systolic blood pressure; WHO-FC, World Health Organization functional class; WU, wood units
